## Effects of Maternal Fortified Balanced Energy-Protein Supplementation on the Mother-Infant Gut Microbiome: A Sub-Study of the MISAME-III Randomized Controlled Trial

Lishi Deng<sup>1,\*</sup> , Steff Taelman<sup>2,3,4,\*</sup> , Matthew R. Olm<sup>5</sup>, Laécia Céline Toé<sup>1,6</sup> , Eva Balini<sup>4</sup>, Lionel Ouédraogo<sup>1,7</sup> , Yuri Bastos-Moreira<sup>1,8</sup> , Alemayehu Argaw<sup>1</sup> , Kokeb Tesfamariam<sup>1</sup> , Erica D. Sonnenburg<sup>5</sup>, Moctar Ouédraogo<sup>9</sup> , Rasmané Ganaba<sup>9</sup> , Wim van Criekinge<sup>2</sup> , Patrick Kolsteren<sup>1</sup> , Michiel Stock<sup>2,3</sup> , Carl Lachat<sup>1</sup> , Justin L. Sonnenburg<sup>5,10,11</sup>, Trenton Dailey-Chwalibóg<sup>1,9</sup> 

1 Department of Food Technology, Safety and Health, Faculty of Bioscience Engineering, Ghent University, Ghent, Belgium.

2 BIOBIX, Department of Data Analysis and Mathematical Modelling, Ghent University, 9000 Ghent, Belgium

3 KERMIT, Department of Data Analysis and Mathematical Modelling, Ghent University, 9000 Ghent, Belgium

4 BioLizard nv, Ghent, Belgium

5 Department of Microbiology and Immunology, Stanford University School of Medicine, Stanford, CA, USA.

6 Institut de Recherche en Sciences de la Santé (IRSS), Unité Nutrition et Maladies Métaboliques.

7 Centre Muraz, Bobo-Dioulasso, Burkina Faso.

8 Center of Excellence in Mycotoxicology and Public Health, MYTOXSOUTH® Coordination Unit, Faculty of Pharmaceutical Sciences, Ghent University, 9000 Ghent, Belgium

9 Agence de Formation de Recherche et d'Expertise en Santé pour l'Afrique (AFRICSanté), Bobo-Dioulasso, Burkina Faso.

10 Chan Zuckerberg Biohub, San Francisco, CA, USA.

11 Center for Human Microbiome Studies, Stanford University School of Medicine, Stanford, CA, USA.

\* These authors contributed equally to the work

Correspondence author: Trenton Dailey-Chwalibóg [[Trenton@Dailey-Chwalibog.com](mailto:Trenton@Dailey-Chwalibog.com)]

### Abstract

Biological pathways, including individual gut microbiome are potential barriers for maternal nutritional supplementation to improvement in infant growth. We evaluated the impact of balanced energy-protein (BEP) supplementation during pregnancy and the first six months of lactation on the composition and functionality of gut microbiome in mothers and their infants in rural Burkina Faso. Our findings reveal that BEP supplementation led to a significant increase in microbiome diversity during pregnancy. In the second trimester, there was a notable decrease in the abundance of an *Oscillospiraceae* species, while postpartum, the abundance of *Bacteroides fragilis* increased. We identified concerted enriched or depleted microbial pathways associated with BEP supplementation, including the phosphotransferase system, a critical mechanism for bacterial carbohydrates uptake, which exhibited enrichment in infants born to BEP-supplemented mothers. Despite these observations, the intricate biological connections with other omics necessitate further analysis to fully elucidate the underlying comprehensive biological pathways.

## 1 **Introduction**

2 It estimated that 148.1 million children under the age of 5 – about 22% of the global  
3 population - experienced stunted growth in 2022, hindering their full developmental  
4 potential<sup>1</sup>. Stunted growth commonly begins before birth, so-called fetal growth restriction  
5 and accumulates during infancy until the age of 18 to 23 months; after 2 years of age, the  
6 growth impairment tends to be largely irreversible<sup>2-5</sup>. Maternal undernutrition in pregnancy is  
7 a major risk factor for poor child growth<sup>2,5</sup>. A growing body of research has investigated the  
8 effect of maternal nutritional supplementation on infant growth, such as lipid-based nutrient  
9 supplement (LNS) and balanced energy-protein (BEP), but the results have been mixed<sup>6-10</sup>.  
10 These findings suggest that the role of biological pathways needs to be considered.

11 From the first colonization of the neonate at birth through maternal microbiota, succession in  
12 bacterial taxa differ based on geographical area<sup>11-13</sup>, feeding practice<sup>14,15</sup>, dietary patterns, age,  
13 and health status<sup>16,17</sup>. A more mature gut microbiota at the first month may improve infant  
14 growth trajectories in the first year of life<sup>18</sup>. Inadequate maturation of the gut microbiome  
15 might contribute to the onset of child malnutrition, and both microbiome immaturity and  
16 malnutrition can be partially ameliorated following nutrition interventions<sup>19,20</sup>. Therefore,  
17 given its plastic nature, the individual gut microbiome appears to be a promising barrier to  
18 improvement in growth outcomes.

19 The evidence on the effect of maternal nutritional supplementation on infant gut microbiome  
20 is scarce. Two analyses based on randomized controlled trials (RCTs) in Malawi showed  
21 inconsistent results. The first study ( $n = 869$ ) revealed a significant enhancement in alpha  
22 diversity among infants receiving LNS from 6 to 18 months<sup>21</sup>, while the second study ( $n =$   
23 631) demonstrated no statistically significant effects of LNS on the diversity and maturation  
24 of the infant gut microbiota in samples collected between 6 and 30 months of age<sup>22</sup>.

25 BEP supplements are a similar type of ready-to-use supplements that provide multiple  
26 micronutrients and, specifically, energy and protein in a balanced composition (<25% of total  
27 energy content from protein) to address maternal malnutrition during pregnancy and lactation.  
28 We previously reported that, in the MICronutriments pour la SANTé de la Mere et de l'Enfant-  
29 III (MISAME-III) trial, BEP supplementation increase energy and macro- and micronutrient  
30 intakes among pregnant women and fills nutrient gaps without displacing food intake<sup>23</sup>.  
31 Moreover, we observed a modest effect of prenatal BEP supplementation on weight and  
32 length increments at birth, and on the prevalence of low birth weight<sup>24</sup>. The improvements in

33 size at birth accrued from prenatal BEP supplementation were sustained in terms of linear  
34 growth at the age of 6 months<sup>7</sup>. However, the impact of providing pregnant and lactating  
35 women with BEP supplementation on gut microbiota has yet to be investigated.

36 The objective of the present study was to evaluate the efficacy of BEP supplementation  
37 during pregnancy and the first six months of lactation in influencing the gut microbiota in  
38 both mothers and infants, compared to the control group who received iron folic acid (IFA)  
39 tablets. This encompasses an examination of the maternal and infant metagenome in terms of  
40 microbial composition and functionality, including microbial metabolic pathways, a  
41 dimension that has not been explored in prior studies.

## 42 **Results**

### 43 **Study population**

44 A total of 731 fecal samples from 152 pregnant and lactating women and their infants ( $n = 71$   
45 in BEP group and  $n = 81$  in IFA group) were collected and sequenced; these comprised 256  
46 infant samples and 475 maternal samples. In the IFA group, infant samples were taken at two  
47 time points, 1-2 months (76 samples) and 5-6 months (56 samples) of life, and maternal  
48 samples were taken at four time points, inclusion (i.e., trimester 2, 20 samples), trimester 3  
49 (78 samples), 1-2 months (76 samples) and 5-6 months (75 samples) postpartum (total IFA  
50 samples = 381). In the BEP group, 66 and 58 infant samples were taken at 1-2 months and 5-  
51 6 months of life, and 22, 71, 66 and 67 maternal samples were taken at inclusion, trimester 3,  
52 1-2 months and 5-6 months postpartum (total BEP samples = 350) (Figure 1).

53 Baseline characteristics of study participants are presented in Table 1. The Mean age of the  
54 study women was 24.27 (SD: 5.55) years, and the average body-mass index (BMI) was 22.37  
55 kg/m<sup>2</sup>. The Mean gestational age at birth was 39.82 (SD: 1.72) weeks and more than one in  
56 three had at least three prior pregnancies. More than half of the women were from food-  
57 insecure households, and 30.3% were anemic. Almost all infants were exclusively breastfed,  
58 with an average duration of 5.78 months. Among all participants, the average compliance rate  
59 of consuming the BEP supplement was 83.1% during the prenatal and 86.0% during the  
60 postnatal supplementation periods.

### 61 **Deep sequencing of gut microbiome and the early colonization**

62 Mean total sequencing depth of infant and maternal metagenomes was 8.03 (SD: 1.87) and  
63 25.29 (SD: 5.28) giga base-pairs, respectively (Figure S1). 7.4% (SD: 1.7%) and 19.9% (SD:

64 18.8%) of metagenomic reads were removed from maternal and infant samples during QC  
65 and human read decontamination. 58.1% (SD: 14.2%) of infant and 58.0% (SD: 3.0%)  
66 maternal reads could be robustly assigned to genomes in our microbial genome database. Out  
67 of the 2,654 unique genomes detected in at least one sample, 2,493 are unique to the maternal  
68 population, 396 are unique to the infant population, and 235 are observed in both groups.  
69 Among the shared microbial genomes, 205 are already observed in the mothers at prenatal  
70 time points. The maternal gut microbiomes were dominated by *Prevotella* species,  
71 representing a median of 37.9% of the composition, with no major shift between pre- and  
72 postnatal compositions (38.1% and 37.7%). In the infant gut microbiomes, *Prevotella*  
73 comprised between 0.0% and 83.9% of the gut microbiome, despite being only observed in  
74 44 out of the 256 infant samples. In most infant samples, *Bifidobacterium* strains were  
75 dominant, comprising a median of 44.5% of the microbial compositions and present in 98.0%  
76 of infant samples (Figure 2A).

#### 77 **BEP supplementation has minimal effect on prenatal gut microbiome composition and** 78 **diversity**

79 The richness of the infant microbiota is markedly smaller than those of the mothers, with an  
80 observed species index between 2 and 43 in the former and between 75 and 614 in the latter.  
81 The Shannon diversity index has a median of 1.48 bits in the infant samples and 4.47 bits in  
82 the maternal samples and is on average higher in the prenatal samples than in the postnatal  
83 ones (Figure 2E). Using Targeted Maximum Likelihood Estimator (TMLE), a significant ( $p =$   
84 0.037) effect of BEP is observed on the prenatal maternal microbiome diversity. The average  
85 treatment effect is estimated at an increase in Shannon diversity index of 0.144 bits caused by  
86 BEP supplementation (95% CI: 0.009 - 0.280). In effective numbers, this translates to an  
87 estimated increase of 1.16 equally common species due to the treatment. No significant  
88 average treatment effect was found on the postnatal ( $p = 0.97$ ) and infant ( $p = 0.11$ ) gut  
89 microbiome diversities.

90 As illustrated in Figure 2B and 2C, beta-diversity analyses show diversification of the  
91 communities, with significant differences between samples taken at different stages of  
92 pregnancy ( $p = 0.002$ ) or infancy ( $p = 0.001$ ). In the maternal samples, a marginally  
93 significant ( $p = 0.098$ ) inter-community difference is attributed to the BEP supplementation,  
94 though this effect is no longer observed in the infant samples ( $p = 0.960$ ).

95 Differential abundance analyses in the maternal stool samples show significant associations  
96 between an *Oscillospiraceae* species [CAG-103 sp 000432375;  $q$ -value =  $2.48 \times 10^{-4}$ ; log fold  
97 change (logFC) = -1.12] and *Bacteroides fragilis* ( $q$ -value =  $3.26 \times 10^{-8}$ ; logFC = 1.31) and  
98 BEP supplementation, at inclusion and 5-6 months postpartum, respectively. No robustly  
99 significant associations were found between BEP supplementation and the microbial  
100 abundances in the infant stool at either time point (Figure 3 and Table S2).

### 101 **BEP supplementation shows coordinated enrichment of specific microbial pathways**

102 Though no significant association was observed between the treatment intervention and the  
103 abundance of individual microbial genes, the Gene Set Enrichment Analysis did indicate  
104 concerted enrichment and depletion of certain microbial pathways at each time point (Figure  
105 4). The gene set for the phosphotransferase system is found to be slightly depleted in the stool  
106 of BEP-supplemented mothers, both pre- and postpartum ( $p=2.56 \times 10^{-5}$  at tri3;  $p=2.23 \times 10^{-3}$  at  
107 pn56) and enriched in stool of BEP-supplemented infants ( $p=2.67 \times 10^{-2}$  at pn12;  $p=2.76 \times 10^{-3}$   
108 at pn56). Pathways for lipopolysaccharide (LPS) biosynthesis ( $p=1.53 \times 10^{-4}$  at tri3;  
109  $p=1.88 \times 10^{-2}$  at pn56), ABC transporters ( $p=2.27 \times 10^{-8}$  at tri3;  $p=1.17 \times 10^{-3}$  at pn56),  
110 biosynthesis of cofactors ( $p=2.27 \times 10^{-8}$  at tri3;  $p=1.42 \times 10^{-2}$  at pn56), and porphyrin  
111 metabolism ( $p=2.85 \times 10^{-3}$  at tri3;  $p=1.74 \times 10^{-2}$  at pn56) are slightly, but significantly depleted  
112 in the BEP supplemented mothers at multiple time points. The pathway for the ribosome  
113 complex is significantly enriched in the BEP-supplemented mothers at multiple time points  
114 ( $p=1.55 \times 10^{-6}$  at tri3;  $p=1.17 \times 10^{-3}$  at pn56). Other pathways, like those for flagellar assembly,  
115 are enriched at inclusion ( $9.35 \times 10^{-5}$ ) yet depleted in the third trimester ( $p=1.45 \times 10^{-5}$ ) and 1-2  
116 months postpartum ( $p=2.95 \times 10^{-8}$ ) in the BEP supplemented mothers. The full table of  
117 significantly differential pathways is available in Table S3.

118 In Figure 5, we show that the gene set depletion of the LPS biosynthesis pathway affects  
119 specific sections of sequential genes in the pathway. Every gene involved in the conversion  
120 from UDP-N-acetyl-D-glucosamine to Lauroyl-KDO2-lipid IV(A) is less abundant with  
121 logFC from -0.033 (LpxH) to -0.140 (LpxC). Only one enriched gene, HddA, appears in the  
122 LPS biosynthesis pathway in another section of differentially abundant genes following the  
123 pentose phosphate pathway. Analogous pathway visualizations are available for the  
124 phosphotransferase system, flagellar assembly, and ABC transporters in Supplementary Data  
125 (Figure S2-S4).

## 126 Discussion

127 Here, we represent a rare combination of deep sequencing depth and high sample size on a  
128 population that is underrepresented in metagenomic literature<sup>25</sup>. We present three novel  
129 findings. First, there is a striking disparity in composition of gut microbiome between  
130 mothers and their infants in rural Burkina Faso – the infant gut microbiota exhibited a  
131 conspicuous dominance of *Bifidobacterium* strains, while *Prevotella* species were dominant  
132 in maternal samples. Second, BEP supplementation has minimal effect on maternal gut  
133 microbiome – increased Shannon diversity and decreased the abundance of an  
134 *Oscillospiraceae* species during pregnancy and increased the abundance of *Bacteroides*  
135 *fragilis* postpartum. Finally, we observed multiple concerted enriched or depleted microbial  
136 pathways associated with BEP supplementation, of which, the pathway phosphotransferase  
137 system, a major mechanism used by bacteria for uptake of carbohydrates<sup>26</sup>, is enriched in  
138 infant samples whose mother were BEP-supplemented.

139 *Bifidobacterium*, commonly found in exclusively breastfed infants, are crucial in the infant  
140 gut because they breakdown human milk oligosaccharides (HMO) to short chain fatty acids  
141 to maintain gut health<sup>27,28</sup>. In this study, nearly all infants, regardless of intervention groups,  
142 experienced exclusive breastfeeding during the sample collection period. This circumstance  
143 might explain the comparability in abundance patterns between the groups and suggests that  
144 the provision of BEP during pregnancy and lactation exerted no discernible impact on the  
145 primary beneficial colonizers or of their HMO utilization genes in infants. Previous  
146 researches highlighting the prevalence of *Prevotella*-rich gut in non-industrialized  
147 populations, particularly those adhering to high-fiber diets, in stark contrast to the lower  
148 occurrence observed in industrialized and westernized nations<sup>11,17,29</sup>. This distinct enterotype  
149 characterized by *Prevotella* enrichment had also been noted in early childhood, spanning a  
150 wide age from 7 to 37 months, as observed in a Gambian cohort<sup>29</sup>. Interestingly, we observed  
151 a strong tie of *Prevotella* between microbial genomes in mother and infant samples. In the  
152 latter, *Prevotella* was either markedly absent or notably abundant, implying its swift  
153 dominance within the ecological niche upon establishing residence within the infantile gut.

154 Gut microbiome alpha diversity has been linked to human health, with lower levels of  
155 diversity associated with several acute and chronic disease<sup>30</sup>. Recent studies have reported a  
156 noteworthy association between a high-fat diet and a decrease alpha diversity, concomitant  
157 with the onset of low-grade inflammation<sup>31,32</sup>. This in turn facilitate the increase and



158 translocation of bacterial products such as pro-inflammatory LPS<sup>33</sup>. Intriguingly, our findings  
159 indicate the contrary: an augmentation in alpha diversity and a concurrent decrease in LPS  
160 synthesis within the prenatal gut microbiota in women who received BEP. The subsection of  
161 the LPS biosynthesis pathway which is depleted, *i.e.*, the central KDO and Lipid A  
162 metabolism, is highly conserved and invariant in the gut microbiome of healthy individuals<sup>34</sup>.  
163 Given that different covalent modifications of Lipid A also have different immunological  
164 properties<sup>35,36</sup>, follow-up research integrating proteomics and metabolomics data is currently  
165 ongoing to fully understand the clinical implications of these findings.

166 The observed significant variation in alpha diversity within the maternal gut microbiota  
167 during pregnancy, without a corresponding effect among infants, suggests that the maternal  
168 component of BEP supplementation did not exert a detectable influence on the diversity of  
169 child's microbiome. This aligns with the observations stemming from an LNS intervention  
170 conducted in rural Malawi<sup>21</sup>.

171 We observed a significant association between BEP supplementation during the second  
172 trimester and a reduction in the abundance of CAG-103 sp000432375, an *Oscillospiraceae*  
173 species that has recently been recognized as responsive to carbohydrates<sup>37</sup>. The overall lesser  
174 dependence on carbohydrate metabolism can also be observed in the concerted depletion of  
175 genes for the phosphotransferase system and ABC transporters in the maternal  
176 metagenomes<sup>38,39</sup>. In addition, BEP supplementation is associated with increased abundance  
177 of *Bacteroides fragilis* within the maternal gut at 5-6 months postpartum. *B. fragilis* is a  
178 major component of the fecal microbiome, with potentially billions of *B. fragilis* within the  
179 gastrointestinal tract<sup>40</sup>, and plays a crucial role in the degradation of host-derived mucosal  
180 glycans, including mucins and the *N*-link oligosaccharides of glycoproteins<sup>41</sup>. Nevertheless,  
181 during the third trimester, a contrasting association was observed between BEP  
182 supplementation and another strain of *B. fragilis*. However, it is important to exercise caution  
183 when interpreting this finding, as it did not withstand the sensitivity analysis for pseudo-  
184 counts, suggesting the possibility of a false positive result.

185 Despite the potential for false positives, BEP supplementation appears to exhibit an  
186 association with the increases in the abundance of *Campylobacter jejuni*, and *Veillonella*  
187 *parvula* and *Klebsiella quasipneumoniae* during the first two months and at the five-to-six  
188 months of early life, respectively. In LMICs, infection with *Campylobacter* is one of the  
189 major causes of diarrheal disease in children<sup>42</sup>, leading to early protein malnutrition<sup>43</sup>. A

190 recent study has reported higher rates of campylobacteriosis among exclusively breastfed  
191 infants in LMICs. It suggests that specific *C. jejuni* strains can utilize HMO and proteins in  
192 human milk to promote the growth of campylobacters<sup>44</sup>. Similarly, another study revealed  
193 that the content of the secretory immunoglobulin A (sIgA) in breastmilk was positively  
194 correlated with the abundance of *V. parvula* in infant gut microbiota, and suggested that this  
195 regulation during early life is one of the potential mechanisms by which sIgA in breast milk  
196 modulates immune function<sup>45</sup>. *Klebsiella pneumoniae*, comprising *K. quasipneumoniae*, is a  
197 leading pathogen for neonatal infection<sup>46,47</sup>. A recent study has reported the association of the  
198 high abundance of *Klebsiella* and high content of breast milk N-acetylneuraminic acid  
199 (Neu5Ac), the predominant form of free salic acid and important component binding to  
200 sialylated oligosaccharides in breast milk, which indicates that *Klebsiella* could utilize sialic  
201 acid as carbon source<sup>48</sup>. Hence, the observed connection between BEP supplementation and  
202 increased abundance of these species in the infant gut microbiome imply that BEP  
203 supplementation during pregnancy and lactation may influence the infant microbiome by  
204 impacting the composition of human milk. However, further analyses aimed at evaluating the  
205 effect of BEP supplementation on breastmilk composition are imperative to gain a more  
206 comprehensive understanding of these observations.

207 We identified that the phosphotransferase system, a critical mechanism for bacterial  
208 carbohydrates uptake, exhibited enrichment in infants born to BEP-supplemented mothers.  
209 This implies that the provision of BEP supplementation to mothers may elevate carbohydrate  
210 content in human milk, thereby augmenting the bacterial carbohydrates uptake capacity  
211 within the infant gut, potentially contributing to enhanced linear growth. However,  
212 subsequent analyses, incorporating a detailed evaluation of human milk components and  
213 employing a multi-omics approach are imperative for a comprehensive understanding of the  
214 intricate biological pathways.

215 Some significantly differential pathways were found that are unlikely to be of microbial  
216 origin, such as those for the ribosome complex, the biosynthesis of cofactors, and porphyrin  
217 metabolism. Though the observation of these pathways is likely a limitation of the KEGG  
218 database these genes were annotated with, their consistent association to the BEP  
219 supplemented metagenome can be indication that there are so far unknown microbial  
220 processes that involve these genes.

221



## 222 **Methods**

### 223 **Study setting and design**

224 The MISAME-III study protocol<sup>49</sup> and the biospecimen sub-study (Biospé)<sup>50</sup> were published  
225 earlier. Briefly, the MISAME-III trial (NCT03533712) is an individually randomized 2 x 2  
226 factorial RCT evaluating the efficacy of multiple micronutrient-fortified BEP  
227 supplementation during pregnancy and lactation on birth outcomes and infant growth in rural  
228 Burkina Faso. Biospé study, which was nested within the MISAME-III trial, aimed to  
229 evaluate the physiological effects of BEP supplementation on both pregnant and lactating  
230 women and their infants.

231 The study was implemented in six rural health center catchment areas in the district of  
232 Houndé in the Hauts-Bassins region of Burkina Faso from October 2019 to December 2020.  
233 A total of 1,897 women aged between 15 and 40 years with a gestational aged < 21  
234 completed weeks, and living in the study catchment villages, were enrolled in this trial. The  
235 habitual diet during pregnancy is nondiverse<sup>51</sup>, being predominantly based on maize with a  
236 supplement of leafy vegetables<sup>52</sup>.

237 Women were randomly assigned to the prenatal intervention arms receiving either fortified  
238 BEP supplements and iron-folic acid (IFA) tablets (i.e., intervention) or IFA alone (i.e.,  
239 control), which is the standard of care during pregnancy in Burkina Faso. The same women  
240 were concurrently randomized to receive either of the postnatal interventions, which  
241 comprised fortified BEP supplementation during the first six months postpartum in  
242 combination with IFA for the first 6 weeks (i.e., intervention), or the postnatal control, which  
243 comprised IFA alone for six weeks postpartum (i.e., control). Therefore, there were four study  
244 groups in MISAME-III study: (1) prenatal BEP and IFA supplementation; (2) postnatal BEP  
245 and IFA supplementation; (3) both pre- and postnatal BEP and IFA supplementation; or (4)  
246 both pre- and postnatal IFA only supplementation.

### 247 **Study supplements**

248 The BEP supplement is a lipid-based nutrient supplement in the form of an energy-dense  
249 peanut paste fortified with multiple micronutrients. The BEP is produced by Nutriset and is  
250 ready-to-consume, does not require a cold chain and is highly stable with a long shelf life.  
251 The complete nutritional composition of a daily dose of the fortified BEP is provided in S1  
252 Table. On average, a daily dose of the BEP (72g) provided an energy top up of 393 kcal (36%

253 energy from lipids, 20% from protein, and 32% from carbohydrates) and covered at least the  
254 estimated average nutritional requirements of pregnant women for 11 micronutrients, except  
255 calcium, phosphorous, and magnesium<sup>53</sup>. A daily dose of an IFA tablets (Sidhaant Life  
256 Science, Delhi, India) contained 65 mg of iron [form: FeH<sub>2</sub>O<sub>5</sub>S] and 400 µg folic acid [form:  
257 C<sub>19</sub>H<sub>19</sub>N<sub>7</sub>O<sub>6</sub>]. Following Burkinabè guidelines, all enrolled women received malaria  
258 prophylaxis (three oral doses of sulfadoxine-pyrimethamine).

### 259 **Fecal sample collection**

260 As a sub-analysis of Biospé study, fecal samples from mother-infant dyads were collected in  
261 all four groups but only two groups of samples, both pre- and postnatal BEP and IFA  
262 supplementation group (BEP group), and both pre- and postnatal IFA only supplementation  
263 group (IFA group) have been sequenced. Maternal fecal samples (8g) were collected in a  
264 fecal pot and then aliquoted into sterile cryotubes (Biosigma, Cona, VE, Italy), flash-frozen  
265 and transferred to a -80 °C freezer. Infant feces (8g) were collected using a 38 × 50 cm sterile  
266 protection sheet (Kimberley-Clark, Irving, TX, USA) which is used like a diaper and  
267 wrapped around the newborn, before they were transferred to a OMNIgene•GUT OM-200  
268 collection kit and then sterile cryotubes for storage at -80 °C. The collected feces were  
269 assessed for consistency based on the visual Bristol scale. For liquid feces, thorough  
270 homogenization was performed using a plastic spoon to mix the solid and liquid.

271 Fecal samples were collected from the pregnant and lactating women at inclusion into the  
272 Biospé study when most of the women were in trimester 2 (19-24 weeks) and have been  
273 taken supplementation for 2-3 weeks, trimester 3 (30-34 weeks) and 1-2 (28-56 days) and 5-6  
274 months (147-175 days) postpartum. Infant fecal samples were collected in 1-2 months (12-56  
275 days of life) and 5-6 months (140-168 days of life) corresponding to maternal postnatal time  
276 points.

### 277 **Metagenomic library preparation and sequencing**

278 DNA extraction, library preparation, and metagenomic sequencing was performed at the UC  
279 San Diego IGM Genomics Center. DNA extraction was performed using the Thermo  
280 MagMAX Microbiome Ultra kit. DNA quantification was performed using picogreen dye.  
281 Roche KAPA HyperPlus and 96-UDI plates were used for library preparation. In this study,  
282 25ng of input DNA and 9 PCR cycles were used during library preparation. A shallow MiSeq  
283 Nano sequencing run was used to normalize read sequencing depth. 2 x 150bp reads were

284 then generated on the Illumina NovaSeq 6000 at a target depth of 25 giga base-pairs per  
285 sample for maternal samples and 10 giga base-pairs per sample for infant samples.

### 286 **Metagenomic read annotation**

287 The metagenomic sequencing reads were trimmed and deduplicated using FastP. All reads  
288 mapping to the hg38 human genome with Bowtie2 under default settings were removed.  
289 Samples were profiled by mapping preprocessed reads from each sample to a previously  
290 established database of microbiome genomes (database “DeltaI”) using Bowtie2 with default  
291 settings. The DeltaI microbial genome database was specifically created to profile non-  
292 industrialized infant microbiomes<sup>13</sup>. The resulting mapping files were analyzed using inStrain  
293 profile under default settings<sup>54</sup>. Relative abundance of each genome was calculated using the  
294 formula: number of reads mapping to genome / number of processed reads in sample. Only  
295 genomes with breadth > 0.5 were considered in analyses.

296 Gene-level functional profiling was performed using the inStrain “parse\_annotations”  
297 pipeline with default settings  
298 ([https://instrain.readthedocs.io/en/master/user\\_manual.html#parse-annotations](https://instrain.readthedocs.io/en/master/user_manual.html#parse-annotations)). Genes were  
299 called for each genome individually using Prodigal in “single” mode, and all gene files were  
300 then concatenated together. Functional annotation was performed against (1) Kyoto  
301 Encyclopedia of Genes and Genomes (KEGG) Orthologies (KOs) using kofam\_scan (version  
302 1.3); (2) carbohydrate-active enzymes (CAZymes) using dbCAN2 (version 11); (3)  
303 Comprehensive Antibiotic Resistance Database (CARD) Anti-Microbial Resistance (AMR)  
304 database version 3.2.5 using Diamond with the command “diamond blastp -f 6 -e 0.0001 -k  
305 1”; and (4) HMO proteins using the instructions provided here:  
306 [https://instrain.readthedocs.io/en/master/user\\_manual.html#human-milk-oligosaccharide-](https://instrain.readthedocs.io/en/master/user_manual.html#human-milk-oligosaccharide-hmo-utilization-genes)  
307 [hmo-utilization-genes](https://instrain.readthedocs.io/en/master/user_manual.html#human-milk-oligosaccharide-hmo-utilization-genes) .

### 308 **Taxonomic data analysis**

309 Alpha-diversity metrics for Observed Species index, Simpson’s Diversity index, and Shannon  
310 Diversity index were calculated in R using phyloseq v1.44.0<sup>55</sup>. The treatment effect of the  
311 randomized intervention was estimated by the doubly robust TMLE in R using tmle v1.5.0<sup>56</sup>.  
312 Given the likely heterogeneity of the effect between the populations, this estimation was  
313 performed for maternal and infant data separately, further separated into pre- and postnatal  
314 for the maternal samples. Maternal stratum data (level of education, marital status, language,  
315 religion, ethnicity, number of jobs, socio-economic status, dietary diversity score, and health

316 center), as well as anthropometric data taken at inclusion into the trial (age, height, BMI and  
317 hemoglobin level) were taken as covariates for the model. Both covariate-outcome and  
318 propensity score models were fitted with ensemble SuperLearner (v2.0-28) models. Diversity  
319 indices were translated to effective numbers of species using the formulas posed by Jost<sup>57</sup>.

320 Beta-diversity analysis was performed in R using vegan v2.6-4. Ordination was performed on  
321 the weighted UniFrac distances between the log transformed strain counts, followed by  
322 multivariate statistics between groups using permutational multivariate analysis of variance  
323 (PERMANOVA) with default parameters.

324 To address compositionality and zero-inflation issues of microbial count data, the differential  
325 abundance analyses was performed by using Analysis of Compositions of Microbiomes with  
326 Bias Correction (ANCOM-BC) v2.2.1 at every taxonomic level separately to identify taxa  
327 associated to the treatment intervention<sup>58</sup>. Benjamini-Hochberg multiple testing correction  
328 was used, and the alpha-level was set at 0.05. To avoid inflated false positive rate, a  
329 sensitivity analysis was conducted against the addition of pseudo-counts. Only robustly  
330 significant taxa were reported.

### 331 **Functional data analysis**

332 A hierarchical differential abundance analyses was conducted on the Trimmed Mean of M-  
333 values (TMM) library sizes for the gene counts using treeclimbR v0.1.5 and edgeR in R<sup>59</sup>.  
334 Genes from KEGG, HMO, CAZyme and CARD were categorized into a hierarchical  
335 structure based on their respective Enzymatic Class (EC) number, functional group, HMO  
336 cluster or antibiotic resistance mechanism. Benjamini-Hochberg multiple testing correction  
337 was used, and the alpha-level was set at 0.05.

338 Using the KEGG pathway mappings, we performed a Gene Set Enrichment Analysis to  
339 identify pathways that were differentially abundant in a coordinated direction<sup>60</sup>. A  
340 *Bifidobacterium longum* NagR regulon gene set was also added for the HMO utilization  
341 genes found in Table 1 of Arzamasov et. al (2022)<sup>61</sup>. For each set, an enrichment score with a  
342 corresponding adjusted p-value was calculated in R using clusterProfiler v4.2.2<sup>62</sup>. The alpha-  
343 level was set at 0.05 and the minimum gene set size to 1.

344 **Ethics**

345 The study was approved by the Commissie voor Medische Ethiek (CME) of Ghent  
346 University Hospital (protocol code: B670201734334 and date of 10/08/2020) and the Comité  
347 d'Éthique Institutionnel de la Recherche En Sciences de la Santé (CEIRES) of the Institut de  
348 Recherche en Sciences de la Santé (IRSS) (protocol code 50-2020/CEIRES and date of  
349 22/10/2020). An independent Data and Safety Monitoring Board (DSMB), comprising an  
350 endocrinologist, two pediatricians, a gynecologist, and an ethicist of both Belgian and  
351 Burkinabe nationalities, was established prior to the start of the efficacy trial. The DSMB  
352 managed remote safety reviews for adverse and serious events at nine and 20 months after the  
353 start of enrolment. The MISAME-III trial was registered on *ClinicalTrials.gov* (identifier:  
354 NCT03533712).

355 **Author Contributions**

356 LD and ST performed the statistical analyses, visualized data, interpreted data, and prepared  
357 the manuscript with contributions from all authors. MRO, EDS, and JLS were responsible for  
358 the sample analysis, interpreted preliminary data and critically reviewed the manuscript.  
359 TDC, LCT, CL and PK conceived of the study, acquired funding, and critically reviewed the  
360 manuscript. TDC, LCT, LO, YBM, MO, RG, CL, and PK set up the study and supervised the  
361 project. TDC, LO, YBM, MO and RG collected samples. TDC, EB, AA, KT, WVC, and MS  
362 supervised the data curation and contributed to data interpretation.  
363 All authors have read and agreed to the published version of the manuscript.

364 **Acknowledgements**

365 The work is supported by the Bill & Melinda Gates Foundation (OPP1175213). Lishi Deng is  
366 supported by the China Scholarship Council (Grant No. 202207650056). Steff Taelman is  
367 supported by the Flemish Agency for Innovation and Entrepreneurship (VLAIO  
368 HBC.2020.2292). This publication includes data generated at the UC San Diego IGM  
369 Genomics Center utilizing an Illumina NovaSeq 6000 that was purchased with funding from  
370 a National Institutes of Health SIG grant (#S10 OD026929). The funders had no role in the  
371 design and conduct of the study; in the collection, management, analysis, and interpretation  
372 of the data; or in the preparation, review, or approval of the manuscript.  
373 The authors thank all participants from Burkina Faso and the data collection team. We thank  
374 Nutriset (France) for donating the BEP supplements.

375 **Data Availability Statement**

376 The informed consent form does not allow sharing of personal data outside the research team.

377 Data will be made available through a data-sharing agreement. Please contact

378 [carl.lachat@ugent.be](mailto:carl.lachat@ugent.be) for any queries. Supporting study documents, including the study

379 protocol and questionnaires, are publicly available on the study's website:

380 <https://misame3.ugent.be> (accessed on 23 November 2023).

381 **Informed Consent Statement**

382 Informed consent was obtained from all subjects involved in the study.

383 **Competing Interests**

384 The authors have declared no competing interests.



## Tables and figures

**Table 1 Baseline characteristics of study participants**

| Characteristics                        | Total (n = 152) | BEP group (n = 71) | IFA group (n = 81) |
|----------------------------------------|-----------------|--------------------|--------------------|
| <b>Health center catchment area, %</b> |                 |                    |                    |
| Boni                                   | 14.5            | 15.5               | 13.4               |
| Donhoun                                | 10.5            | 11.3               | 9.9                |
| Dougoumato II                          | 18.4            | 21.1               | 16.0               |
| Karaba                                 | 12.5            | 12.7               | 12.3               |
| Kari                                   | 21.7            | 21.1               | 22.2               |
| Koumbia                                | 18.4            | 15.5               | 21.0               |
| <b>Household level</b>                 |                 |                    |                    |
| Household food insecurity*, %          | 59.9            | 62.0               | 58.0               |
| Wealth index, 0 to 10 poits            | 4.64 ± 1.75     | 4.69 ± 1.67        | 4.59 ± 1.82        |
| <b>Maternal</b>                        |                 |                    |                    |
| Age, years                             | 24.27 ± 5.55    | 23.37 ± 5.56       | 25.06 ± 5.46       |
| Ethnic group, %                        |                 |                    |                    |
| Bwaba                                  | 52.0            | 49.3               | 54.3               |
| Mossi                                  | 35.5            | 39.4               | 32.1               |
| Others                                 | 12.5            | 11.3               | 13.6               |
| Religion of pregnant women, %          |                 |                    |                    |
| Animist                                | 22.4            | 22.5               | 22.2               |
| Muslim                                 | 45.4            | 47.9               | 43.2               |
| Catholic                               | 6.6             | 7.0                | 6.2                |
| Protestant                             | 23.0            | 19.7               | 25.9               |
| No religion, no animist                | 2.6             | 2.8                | 2.5                |
| Primary education and above, %         | 42.1            | 38.0               | 45.7               |
| Number of jobs, %                      |                 |                    |                    |
| 0                                      | 58.6            | 64.8               | 53.1               |
| 1                                      | 38.8            | 33.8               | 43.2               |
| 2 and above                            | 2.6             | 1.4                | 3.7                |
| Gestational age at birth, weeks        | 39.82 ± 1.72    | 40.04 ± 1.63       | 39.63 ± 1.79       |
| Parity, %                              |                 |                    |                    |
| 0                                      | 25.0            | 29.6               | 21.0               |
| 1-2                                    | 36.8            | 33.8               | 39.5               |
| 3 or more                              | 38.2            | 36.6               | 39.5               |
| Weight, kg                             | 59.10 ± 10.62   | 57.73 ± 8.30       | 60.30 ± 12.23      |
| Height, cm                             | 162.35 ± 5.87   | 162.13 ± 4.96      | 162.55 ± 6.59      |
| BMI, kg/m <sup>2</sup>                 | 22.37 ± 3.47    | 21.97 ± 3.16       | 22.71 ± 3.71       |
| Hb, g/dL                               | 11.88 ± 1.38    | 11.59 ± 1.47       | 11.73 ± 1.43       |
| Anemia, Hb <11 g/dL, %                 | 30.3            | 26.8               | 33.3               |
| Number of months receiving EBF         | 5.78 ± 1.01     | 5.91 ± 0.74        | 5.67 ± 1.20        |

Values are percentages or means ± SDs.

\*Assessed using FANTA/USAID's Household Food Insecurity Access Scale.

EBF, exclusive breastfeeding; BMI, body mass index; Hb, hemoglobin; SD, standard deviation.

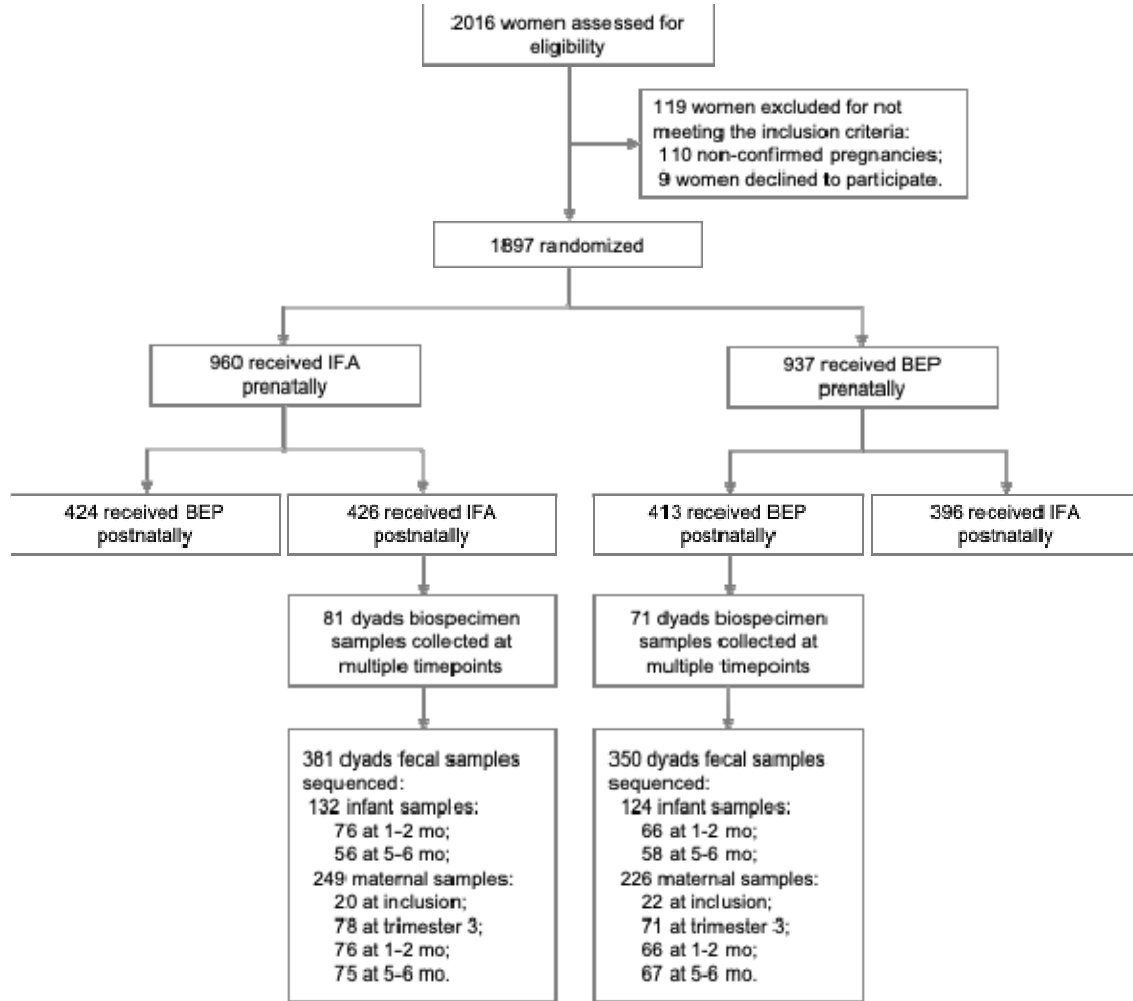

**Figure 1:** Flow diagram of recruitment, enrollment, and stool sample collection from women and their infants. BEP, balanced energy-protein; IFA, iron-folic acid.

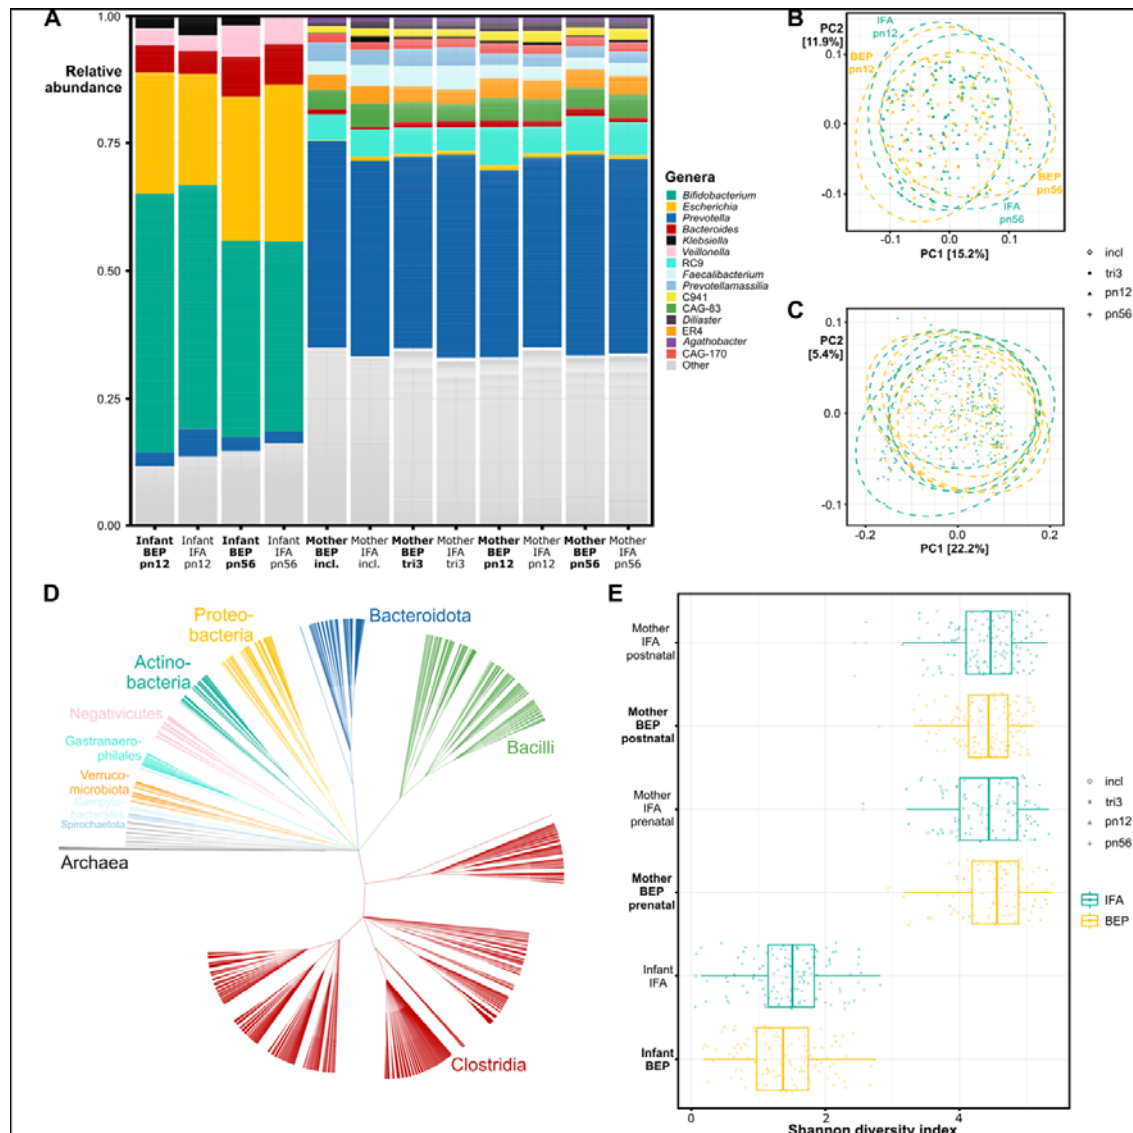

**Figure 2:** (A) Taxonomic compositions of the top-15 most abundant genera (on average across all samples) aggregated on the treatment- and time groups. The lesser abundant genera are grouped into the “Other” category. (B) A PCoA ordination plot of the infant samples. Samples are colored based on the treatment group. (C) A PCoA ordination plot of the maternal samples, colored on treatment group. (D) The taxonomic tree of the strains identified across all samples, colored on phylum. (E) Combined box- and jitter plots of the Shannon diversity indices of the samples, grouped on pre- and postnatal, and on whether the sample was isolated from the infant or the mother, colored on treatment group. Abbreviation: pn12, postnatal 1-2 months; pn56, postnatal 5-6 months; incl., inclusion; tri3, trimester 3.

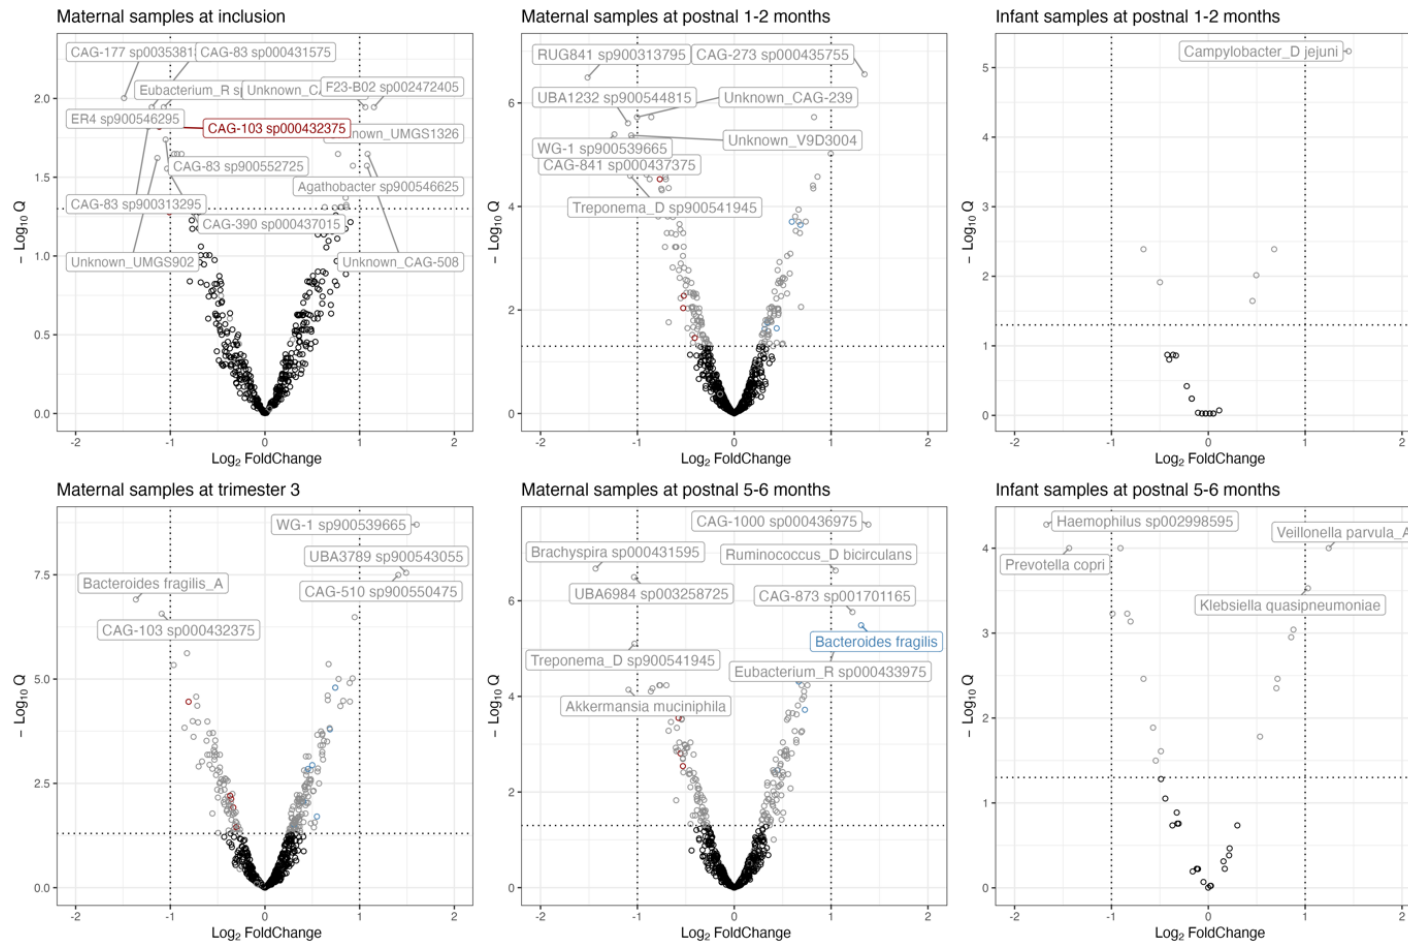

**Figure 3:** Volcano plots showing differential taxa between two treatment groups at different time points, by ANCOM-BC2. Each point represents an individual taxon, and the position along the x-axis represents logFC in its abundance. The dashed line and labels show the thresholds of statistical and biological significance (Benjamini-Hochberg adjusted  $p$ -values  $< 0.05$  and  $|\logFC| > 1$ ). The colored dots represent significantly enriched (blue) and depleted (red) taxa that have successfully passed the sensitivity analysis for pseudo-counts. A full table of outputs from ANCOM-BC2 at each time point can be found in [Table S2](#).

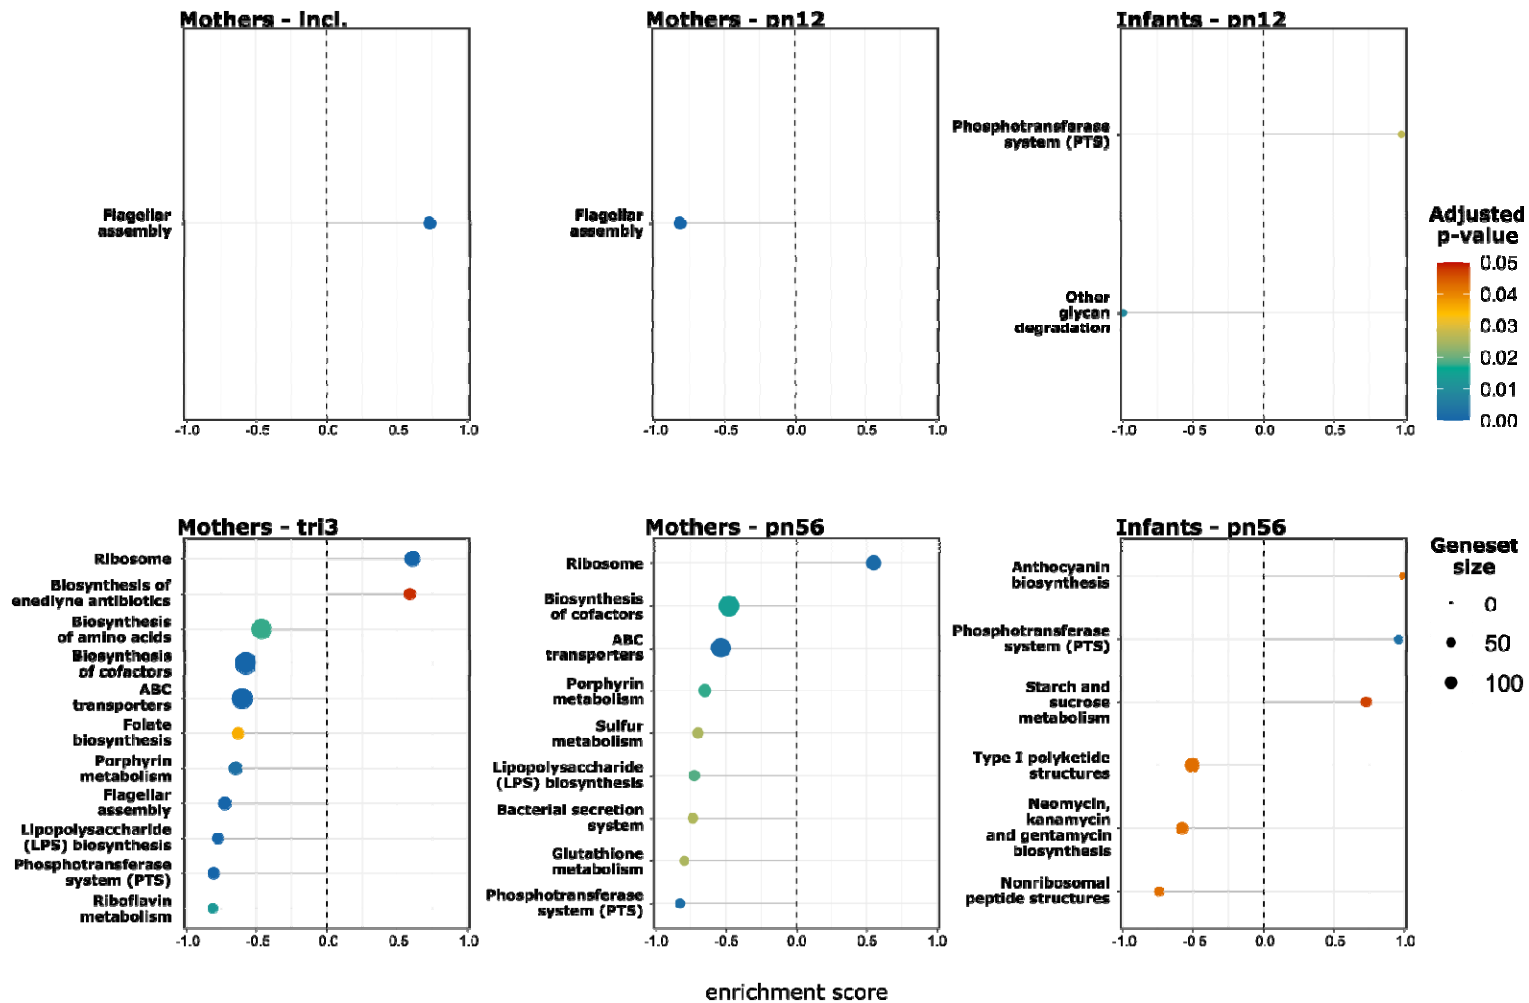

**Figure 4:** Significantly enriched or depleted KEGG pathways associated to BEP supplementation for each time point. Abbreviation: pn12, postnatal 1-2 months; pn56, postnatal 5-6 months; incl., inclusion; tri3, trimester 3. Points are colored according to adjusted p-value and point size corresponds to geneset size.

It is made available under a [CC-BY 4.0 International license](https://creativecommons.org/licenses/by/4.0/).

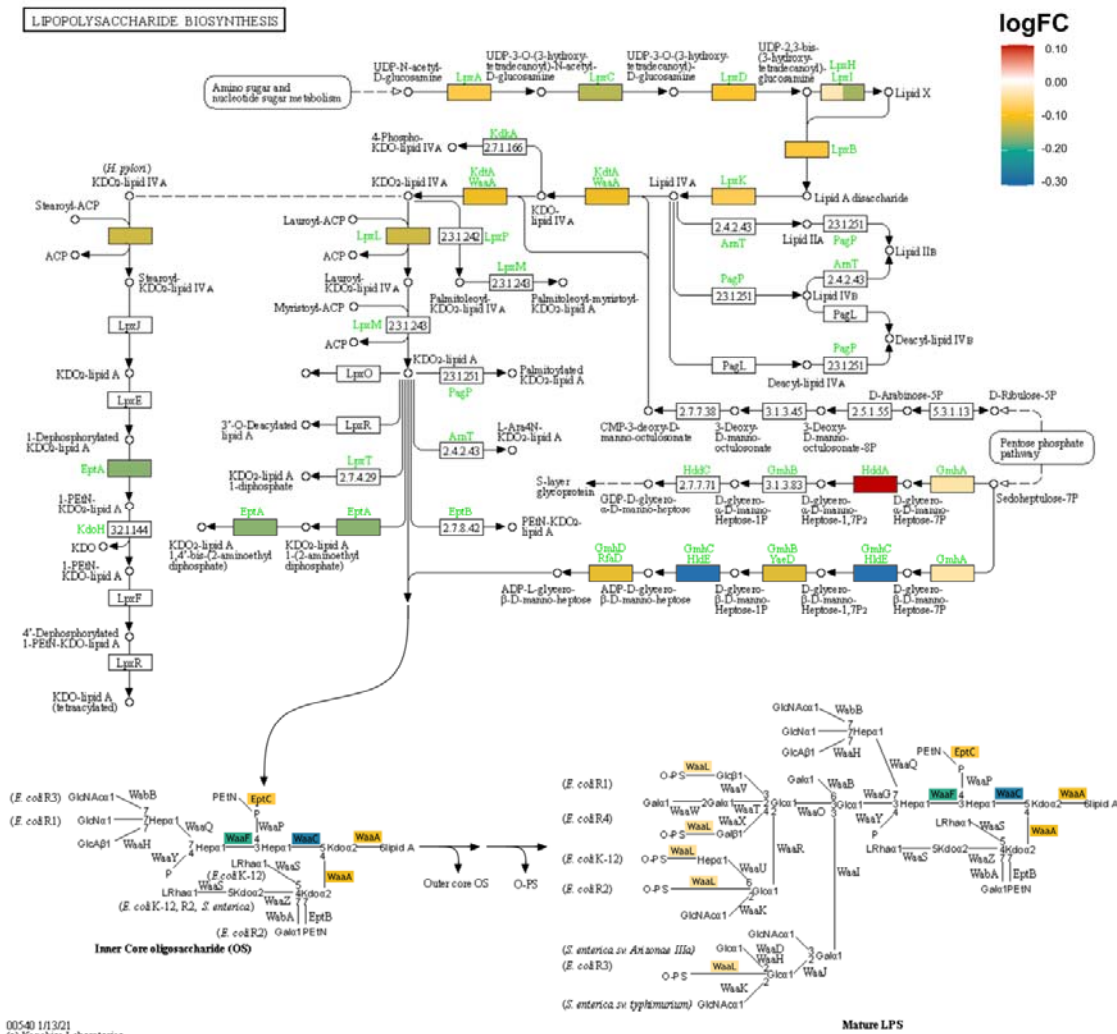

**Figure 5:** The lipopolysaccharide biosynthesis KEGG pathway (map00540<sup>63</sup>) in maternal samples during the third trimester of pregnancy. Genes colored in yellow, green, and blue are incrementally less abundantly observed in the BEP-supplemented group. Genes colored in red are more abundantly observed in the BEP-supplemented group.



**Table S1:** Nutritional values of the ready-to-use supplementary food for pregnant and lactating women.

**Table S2:** Results of the differential abundance analyses between intervention groups.

**Table S3:** Results of the gene set enrichment analyses between intervention groups.

It is made available under a [CC-BY 4.0 International license](https://creativecommons.org/licenses/by/4.0/) .

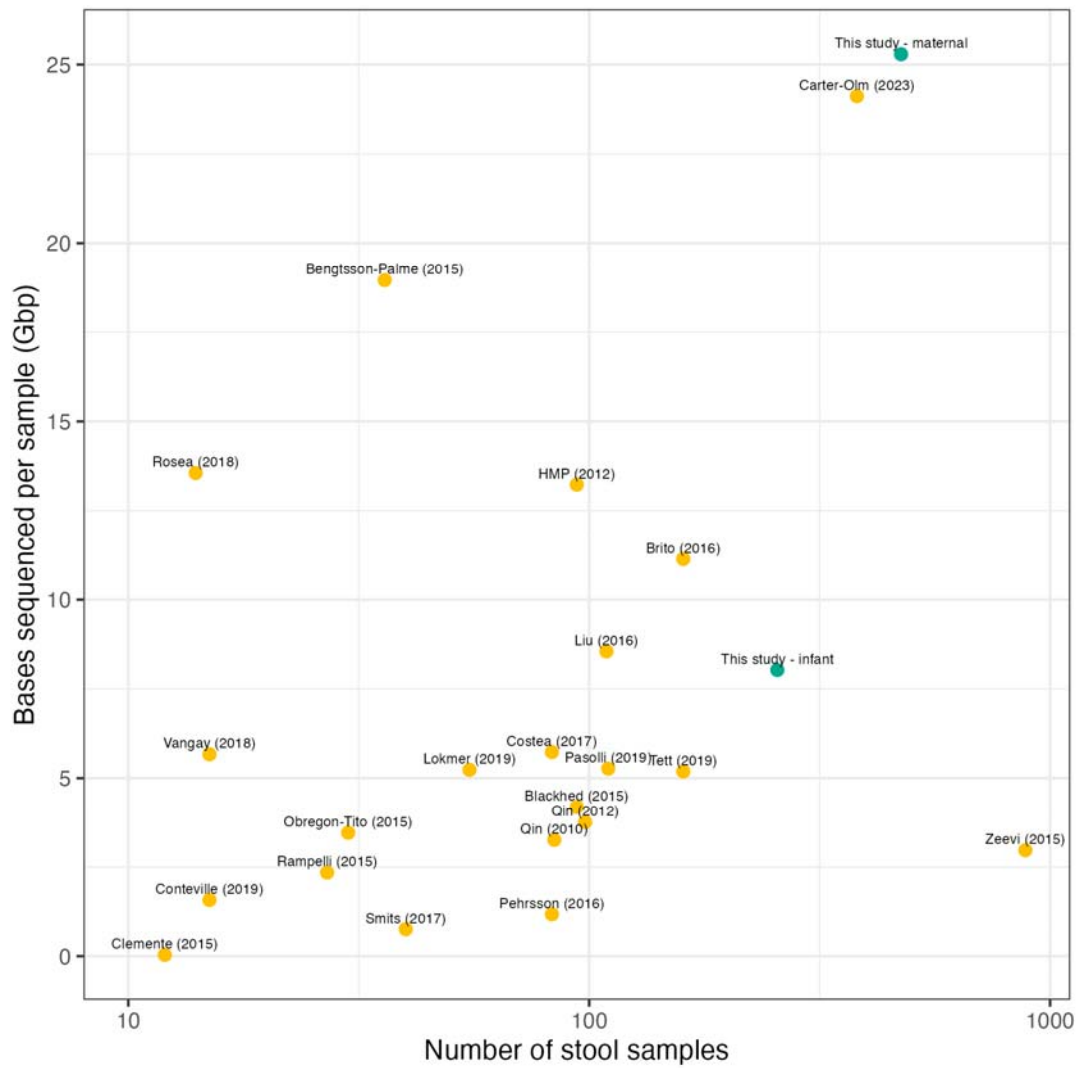

**Figure S1:** The number of samples versus the number of bases sequenced per sample for various gut metagenomic datasets and this study (adapted from (Carter et al., 2023)<sup>64</sup>).



It is made available under a [CC-BY 4.0 International license](https://creativecommons.org/licenses/by/4.0/).

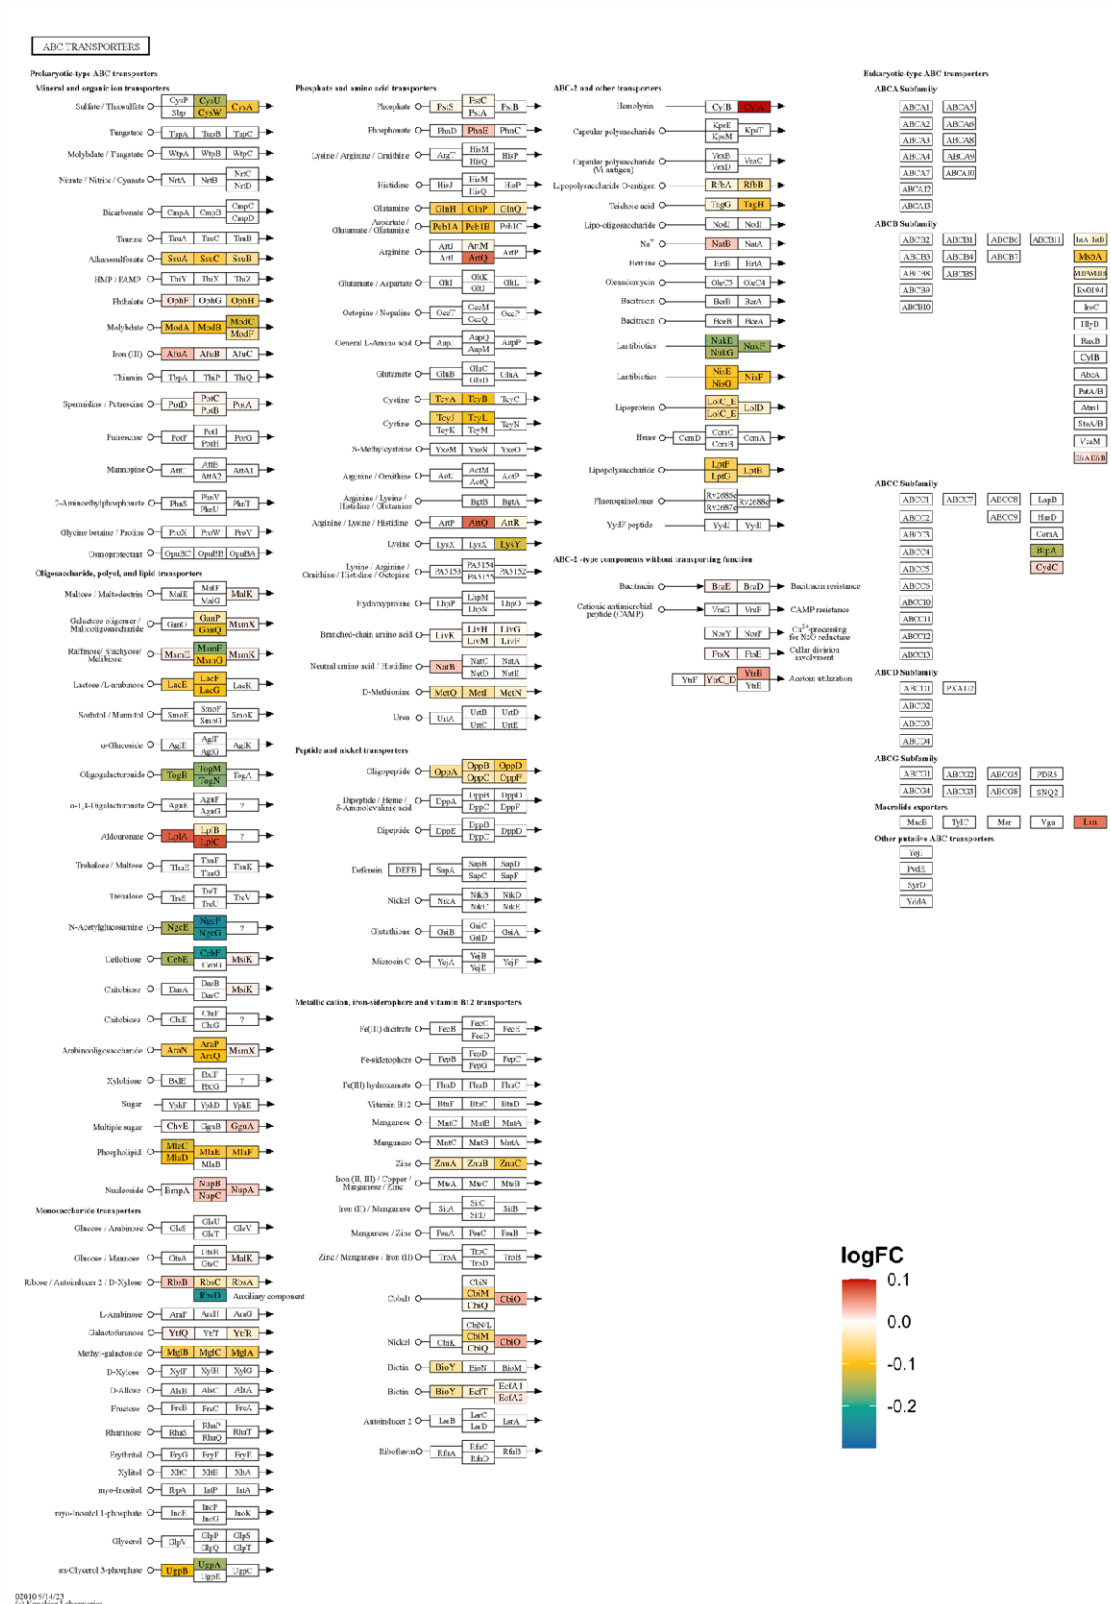

**Figure S3:** The ABC transporters KEGG pathway (map02010)<sup>63</sup> in maternal samples during the third trimester of pregnancy. Genes colored in yellow, green, and blue are incrementally less abundantly observed in the BEP-supplemented group. Genes colored in red are more abundantly observed in the BEP-supplemented group.

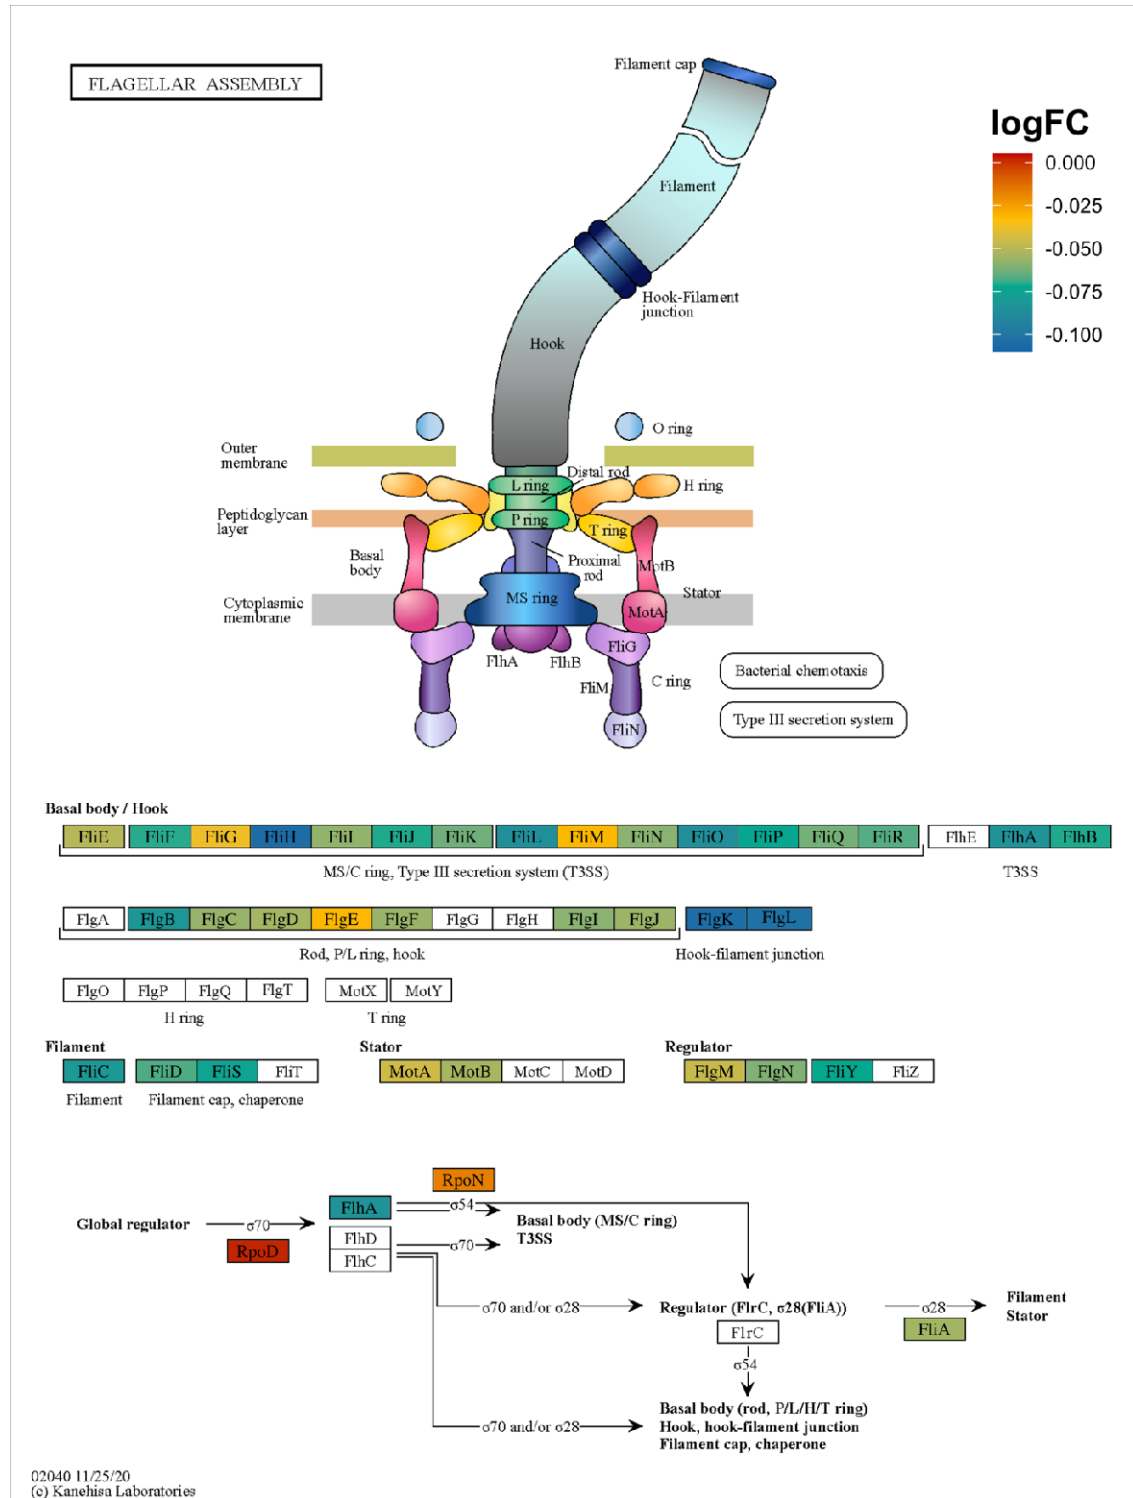

**Figure S4:** The flagellar assembly KEGG pathway (map02040<sup>63</sup>) in maternal samples during the third trimester of pregnancy. Genes colored in red, yellow, green, and blue are incrementally less abundantly observed in the BEP-supplemented group.

## References

1. Levels and trends in child malnutrition: UNICEF/WHO/World Bank Group joint child malnutrition estimates: key findings of the 2023 edition.  
<https://www.who.int/publications-detail-redirect/9789240073791> (2023).
2. Black, R. E. et al. Maternal and child undernutrition and overweight in low-income and middle-income countries. *The Lancet* **382**, 427–451 (2013).
3. Martorell, R., Khan, K. & Schroeder, D. G. Reversibility of stunting: epidemiological findings in children from developing countries. *Reversibility Stunting Epidemiol. Find. Child. Dev. Ctries.* **48**, S45–S57 (1994).
4. Victora, C. G., de Onis, M., Hallal, P. C., Blössner, M. & Shrimpton, R. Worldwide Timing of Growth Faltering: Revisiting Implications for Interventions. *Pediatrics* **125**, e473–e480 (2010).
5. Victora, C. G. et al. Revisiting maternal and child undernutrition in low-income and middle-income countries: variable progress towards an unfinished agenda. *The Lancet* **397**, 1388–1399 (2021).
6. Adu-Afarwuah, S. et al. Small-quantity, lipid-based nutrient supplements provided to women during pregnancy and 6 mo postpartum and to their infants from 6 mo of age increase the mean attained length of 18-mo-old children in semi-urban Ghana: a randomized controlled trial. *Am. J. Clin. Nutr.* **104**, 797–808 (2016).
7. Argaw, A. et al. Fortified balanced energy–protein supplementation during pregnancy and lactation and infant growth in rural Burkina Faso: A 2 × 2 factorial individually randomized controlled trial. *PLOS Med.* **20**, e1004186 (2023).
8. Dewey, K. G. et al. Lipid-based nutrient supplementation in the first 1000 d improves child growth in Bangladesh: a cluster-randomized effectiveness trial. *Am. J. Clin. Nutr.* **105**, 944–957 (2017).



9. Galasso, E., Weber, A. M., Stewart, C. P., Ratsifandrihamanana, L. & Fernald, L. C. H. Effects of nutritional supplementation and home visiting on growth and development in young children in Madagascar: a cluster-randomised controlled trial. *Lancet Glob. Health* **7**, e1257–e1268 (2019).
10. Krebs, N. F. et al. Growth from Birth Through Six Months for Infants of Mothers in the “Women First” Preconception Maternal Nutrition Trial. *J. Pediatr.* **229**, 199-206.e4 (2021).
11. De Filippo, C. et al. Impact of diet in shaping gut microbiota revealed by a comparative study in children from Europe and rural Africa. *Proc. Natl. Acad. Sci.* **107**, 14691–14696 (2010).
12. Grzeskowiak, L. et al. Distinct Gut Microbiota in Southeastern African and Northern European Infants. *J. Pediatr. Gastroenterol. Nutr.* **54**, 812 (2012).
13. Olm, M. R. et al. Robust variation in infant gut microbiome assembly across a spectrum of lifestyles. *Science* **376**, 1220–1223 (2022).
14. Bezirtzoglou, E., Tsotsias, A. & Welling, G. W. Microbiota profile in feces of breast- and formula-fed newborns by using fluorescence in situ hybridization (FISH). *Anaerobe* **17**, 478–482 (2011).
15. Stewart, C. J. et al. Temporal development of the gut microbiome in early childhood from the TEDDY study. *Nature* **562**, 583–588 (2018).
16. Ottman, N., Smidt, H., de Vos, W. & Belzer, C. The function of our microbiota: who is out there and what do they do? *Front. Cell. Infect. Microbiol.* **2**, (2012).
17. Yatsunencko, T. et al. Human gut microbiome viewed across age and geography. *Nature* **486**, 222–227 (2012).
18. Alderete, T. L. et al. Early life gut microbiota is associated with rapid infant growth in Hispanics from Southern California. *Gut Microbes* **13**, 1961203 (2021).

19. Iddrisu, I. et al. Malnutrition and Gut Microbiota in Children. *Nutrients* **13**, 2727 (2021).
20. Subramanian, S. et al. Persistent gut microbiota immaturity in malnourished Bangladeshi children. *Nature* **510**, 417–421 (2014).
21. Arox W, K. et al. Provision of Lipid-Based Nutrient Supplements to Mothers During Pregnancy and 6 Months Postpartum and to Their Infants from 6 to 18 Months Promotes Infant Gut Microbiota Diversity at 18 Months of Age but Not Microbiota Maturation in a Rural Malawian Setting: Secondary Outcomes of a Randomized Trial. *J. Nutr.* **150**, 918–928 (2020).
22. Kortekangas, E. et al. A Prospective Study on Child Morbidity and Gut Microbiota in Rural Malawi. *J. Pediatr. Gastroenterol. Nutr.* **69**, 431 (2019).
23. de Kok, B. et al. Fortified Balanced Energy-Protein Supplements Increase Nutrient Adequacy without Displacing Food Intake in Pregnant Women in Rural Burkina Faso. *J. Nutr.* **151**, 3831–3840 (2021).
24. De Kok, B. et al. Prenatal fortified balanced energy-protein supplementation and birth outcomes in rural Burkina Faso: A randomized controlled efficacy trial. *PLOS Med.* **19**, e1004002 (2022).
25. Abdill, R. J., Adamowicz, E. M. & Blekhman, R. Public human microbiome data are dominated by highly developed countries. *PLOS Biol.* **20**, e3001536 (2022).
26. Kotrba, P., Inui, M. & Yukawa, H. Bacterial phosphotransferase system (PTS) in carbohydrate uptake and control of carbon metabolism. *J. Biosci. Bioeng.* **92**, 502–517 (2001).
27. Matsuki, T. et al. A key genetic factor for fucosyllactose utilization affects infant gut microbiota development. *Nat. Commun.* **7**, 11939 (2016).
28. Scheppach, W. Effects of short chain fatty acids on gut morphology and function. *Gut* **35**, S35–S38 (1994).

29. De Goffau, M. C. et al. Gut microbiomes from Gambian infants reveal the development of a non-industrialized Prevotella-based trophic network. *Nat. Microbiol.* **7**, 132–144 (2021).
30. Pickard, J. M., Zeng, M. Y., Caruso, R. & Núñez, G. Gut microbiota: Role in pathogen colonization, immune responses, and inflammatory disease. *Immunol. Rev.* **279**, 70–89 (2017).
31. Gulhane, M. et al. High Fat Diets Induce Colonic Epithelial Cell Stress and Inflammation that is Reversed by IL-22. *Sci. Rep.* **6**, 28990 (2016).
32. Di Gesù, C. M., Matz, L. M. & Buffington, S. A. Diet-induced dysbiosis of the maternal gut microbiome in early life programming of neurodevelopmental disorders. *Neurosci. Res.* **168**, 3–19 (2021).
33. Chakaroun, R. M., Massier, L. & Kovacs, P. Gut Microbiome, Intestinal Permeability, and Tissue Bacteria in Metabolic Disease: Perpetrators or Bystanders? *Nutrients* **12**, 1082 (2020).
34. Bradley, P. H. & Pollard, K. S. Proteobacteria explain significant functional variability in the human gut microbiome. *Microbiome* **5**, 36 (2017).
35. Coats, S. R. et al. The Lipid A Phosphate Position Determines Differential Host Toll-Like Receptor 4 Responses to Phylogenetically Related Symbiotic and Pathogenic Bacteria. *Infect. Immun.* **79**, 203–210 (2011).
36. Schromm, A. B. et al. Biological activities of lipopolysaccharides are determined by the shape of their lipid A portion: Bioactivity of LPS determined by lipid A shape. *Eur. J. Biochem.* **267**, 2008–2013 (2000).
37. Ravi, A. et al. Linking carbohydrate structure with function in the human gut microbiome using hybrid metagenome assemblies. 2021.05.11.441322 Preprint at <https://doi.org/10.1101/2021.05.11.441322> (2021).

38. Deutscher, J., Francke, C. & Postma, P. W. How Phosphotransferase System-Related Protein Phosphorylation Regulates Carbohydrate Metabolism in Bacteria. *Microbiol. Mol. Biol. Rev.* **70**, 939–1031 (2006).
39. Schneider, E. ABC transporters catalyzing carbohydrate uptake. *Res. Microbiol.* **152**, 303–310 (2001).
40. Patrick, S. A tale of two habitats: *Bacteroides fragilis*, a lethal pathogen and resident in the human gastrointestinal microbiome. *Microbiology* **168**, 001156 (2022).
41. Briliūtė, J. et al. Complex N-glycan breakdown by gut *Bacteroides* involves an extensive enzymatic apparatus encoded by multiple co-regulated genetic loci. *Nat. Microbiol.* **4**, 1571–1581 (2019).
42. Liu, J. et al. Use of quantitative molecular diagnostic methods to identify causes of diarrhoea in children: a reanalysis of the GEMS case-control study. *The Lancet* **388**, 1291–1301 (2016).
43. Schnee, A. E. & Petri, W. A. *Campylobacter jejuni* and associated immune mechanisms: short-term effects and long-term implications for infants in low-income countries. *Curr. Opin. Infect. Dis.* **30**, 322–328 (2017).
44. Bian, X. et al. *Campylobacter* Abundance in Breastfed Infants and Identification of a New Species in the Global Enterics Multicenter Study. *mSphere* **5**, 10.1128/msphere.00735-19 (2020).
45. Xi, M. et al. Functional proteins in breast milk and their correlation with the development of the infant gut microbiota: a study of mother-infant pairs. *Front. Microbiol.* **14**, 1239501 (2023).
46. Laxminarayan, R. & Bhutta, Z. A. Antimicrobial resistance—a threat to neonate survival. *Lancet Glob. Health* **4**, e676–e677 (2016).

47. Rodrigues, C. et al. Description of *Klebsiella africanensis* sp. nov., *Klebsiella variicola* subsp. *tropicalensis* subsp. nov. and *Klebsiella variicola* subsp. *variicola* subsp. nov. Res. Microbiol. **170**, 165–170 (2019).
48. Ouyang, R. et al. Crosstalk between Breast Milk N-Acetylneuraminic Acid and Infant Growth in a Gut Microbiota-Dependent Manner. *Metabolites* **13**, 846 (2023).
49. Vanslambrouck, K. et al. Effect of balanced energy-protein supplementation during pregnancy and lactation on birth outcomes and infant growth in rural Burkina Faso: study protocol for a randomised controlled trial. *BMJ Open* **11**, e038393 (2021).
50. Bastos-Moreira, Y. et al. A Multi-Omics and Human Biomonitoring Approach to Assessing the Effectiveness of Fortified Balanced Energy–Protein Supplementation on Maternal and Newborn Health in Burkina Faso: A Study Protocol. *Nutrients* **15**, 4056 (2023).
51. Hanley-Cook, G. T. et al. Seasonality and Day-to-Day Variability of Dietary Diversity: Longitudinal Study of Pregnant Women Enrolled in a Randomized Controlled Efficacy Trial in Rural Burkina Faso. *J. Nutr.* **152**, 2145–2154 (2022).
52. Huybregts, L. F., Roberfroid, D. A., Kolsteren, P. W. & Van Camp, J. H. Dietary behaviour, food and nutrient intake of pregnant women in a rural community in Burkina Faso. *Matern. Child. Nutr.* **5**, 211–222 (2009).
53. Food and Nutrition Board, Institute of Medicine & National Academies. Dietary Reference Intakes (DRIs): Recommended Dietary Allowances and Adequate Intakes, Vitamins. <https://www.ncbi.nlm.nih.gov/books/NBK56068/table/summarytables.t2/> (2011).
54. Olm, M. R. et al. inStrain profiles population microdiversity from metagenomic data and sensitively detects shared microbial strains. *Nat. Biotechnol.* **39**, 727–736 (2021).

55. McMurdie, P. J. & Holmes, S. phyloseq: An R Package for Reproducible Interactive Analysis and Graphics of Microbiome Census Data. *PLoS ONE* **8**, e61217 (2013).
56. Gruber, S. & Laan, M. J. V. D. tmle: Package for Targeted Maximum Likelihood Estimation. *J. Stat. Softw.* **51**, (2012).
57. Jost, L. Entropy and diversity. *Oikos* **113**, 363–375 (2006).
58. Lin, H. & Peddada, S. D. Analysis of compositions of microbiomes with bias correction. *Nat. Commun.* **11**, 3514 (2020).
59. Huang, R. et al. treeclimbR pinpoints the data-dependent resolution of hierarchical hypotheses. *Genome Biol.* **22**, 157 (2021).
60. Subramanian, A. et al. Gene set enrichment analysis: A knowledge-based approach for interpreting genome-wide expression profiles. *Proc. Natl. Acad. Sci.* **102**, 15545–15550 (2005).
61. Arzamasov, A. A. et al. Human Milk Oligosaccharide Utilization in Intestinal Bifidobacteria Is Governed by Global Transcriptional Regulator NagR. *mSystems* **7**, e00343-22 (2022).
62. Wu, T. et al. clusterProfiler 4.0: A universal enrichment tool for interpreting omics data. *The Innovation* **2**, 100141 (2021).
63. Kanehisa, M. & Goto, S. KEGG: Kyoto Encyclopedia of Genes and Genomes. (2000).
64. Carter, M. M. et al. Ultra-deep sequencing of Hadza hunter-gatherers recovers vanishing gut microbes. *Cell* **186**, 3111-3124.e13 (2023).

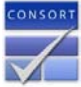

# CONSORT 2010 checklist of information to include when reporting a randomised trial\*

| Section/Topic                    | Item No | Checklist item                                                                                                                                                                              | Reported on page No |
|----------------------------------|---------|---------------------------------------------------------------------------------------------------------------------------------------------------------------------------------------------|---------------------|
| <b>Title and abstract</b>        |         |                                                                                                                                                                                             |                     |
|                                  | 1a      | Identification as a randomised trial in the title                                                                                                                                           | 1                   |
|                                  | 1b      | Structured summary of trial design, methods, results, and conclusions (for specific guidance see CONSORT for abstracts)                                                                     | 1                   |
| <b>Introduction</b>              |         |                                                                                                                                                                                             |                     |
| Background and objectives        | 2a      | Scientific background and explanation of rationale                                                                                                                                          | 2, 3                |
|                                  | 2b      | Specific objectives or hypotheses                                                                                                                                                           | 3                   |
| <b>Methods</b>                   |         |                                                                                                                                                                                             |                     |
| Trial design                     | 3a      | Description of trial design (such as parallel, factorial) including allocation ratio                                                                                                        | 9                   |
|                                  | 3b      | Important changes to methods after trial commencement (such as eligibility criteria), with reasons                                                                                          | 9                   |
| Participants                     | 4a      | Eligibility criteria for participants                                                                                                                                                       | 9                   |
|                                  | 4b      | Settings and locations where the data were collected                                                                                                                                        | 9                   |
| Interventions                    | 5       | The interventions for each group with sufficient details to allow replication, including how and when they were actually administered                                                       | 9, 10               |
| Outcomes                         | 6a      | Completely defined pre-specified primary and secondary outcome measures, including how and when they were assessed                                                                          | 9, 10               |
|                                  | 6b      | Any changes to trial outcomes after the trial commenced, with reasons                                                                                                                       | NA                  |
| Sample size                      | 7a      | How sample size was determined                                                                                                                                                              | 3                   |
|                                  | 7b      | When applicable, explanation of any interim analyses and stopping guidelines                                                                                                                | NA                  |
| Randomisation:                   |         |                                                                                                                                                                                             |                     |
| Sequence generation              | 8a      | Method used to generate the random allocation sequence                                                                                                                                      | 9                   |
|                                  | 8b      | Type of randomisation; details of any restriction (such as blocking and block size)                                                                                                         | 9                   |
| Allocation concealment mechanism | 9       | Mechanism used to implement the random allocation sequence (such as sequentially numbered containers), describing any steps taken to conceal the sequence until interventions were assigned | 9                   |
| Implementation                   | 10      | Who generated the random allocation sequence, who enrolled participants, and who assigned participants to interventions                                                                     | NA                  |
| Blinding                         | 11a     | If done, who was blinded after assignment to interventions (for example, participants, care providers, those assessing outcomes) and how                                                    | NA                  |
|                                  | 11b     | If relevant, description of the similarity of interventions                                                                                                                                 | NA                  |
| Statistical methods              | 12a     | Statistical methods used to compare groups for primary and secondary outcomes                                                                                                               | 10 - 12             |
|                                  | 12b     | Methods for additional analyses, such as subgroup analyses and adjusted analyses                                                                                                            | NA                  |

medRxiv preprint doi: <https://doi.org/10.1101/2023.11.24.23298964>; this version posted November 27, 2023. The copyright holder for this preprint (which was not certified by peer review) is the author/funder, who has granted medRxiv a license to display the preprint in perpetuity. It is made available under a [CC-BY 4.0 International license](https://creativecommons.org/licenses/by/4.0/).

|                                                      |     |                                                                                                                                                   |       |
|------------------------------------------------------|-----|---------------------------------------------------------------------------------------------------------------------------------------------------|-------|
| <b>Results</b>                                       |     |                                                                                                                                                   |       |
| Participant flow (a diagram is strongly recommended) | 13a | For each group, the numbers of participants who were randomly assigned, received intended treatment, and were analysed for the primary outcome    | 3     |
|                                                      | 13b | For each group, losses and exclusions after randomisation, together with reasons                                                                  | 3     |
| Recruitment                                          | 14a | Dates defining the periods of recruitment and follow-up                                                                                           | 9     |
|                                                      | 14b | Why the trial ended or was stopped                                                                                                                | NA    |
| Baseline data                                        | 15  | A table showing baseline demographic and clinical characteristics for each group                                                                  | 15    |
| Numbers analysed                                     | 16  | For each group, number of participants (denominator) included in each analysis and whether the analysis was by original assigned groups           | 3     |
| Outcomes and estimation                              | 17a | For each primary and secondary outcome, results for each group, and the estimated effect size and its precision (such as 95% confidence interval) | 3 - 5 |
|                                                      | 17b | For binary outcomes, presentation of both absolute and relative effect sizes is recommended                                                       | NA    |
| Ancillary analyses                                   | 18  | Results of any other analyses performed, including subgroup analyses and adjusted analyses, distinguishing pre-specified from exploratory         | NA    |
| Harms                                                | 19  | All important harms or unintended effects in each group (for specific guidance see CONSORT for harms)                                             | NA    |
| <b>Discussion</b>                                    |     |                                                                                                                                                   |       |
| Limitations                                          | 20  | Trial limitations, addressing sources of potential bias, imprecision, and, if relevant, multiplicity of analyses                                  | 8     |
| Generalisability                                     | 21  | Generalisability (external validity, applicability) of the trial findings                                                                         | 5, 6  |
| Interpretation                                       | 22  | Interpretation consistent with results, balancing benefits and harms, and considering other relevant evidence                                     | 6 - 8 |
| <b>Other information</b>                             |     |                                                                                                                                                   |       |
| Registration                                         | 23  | Registration number and name of trial registry                                                                                                    | 13    |
| Protocol                                             | 24  | Where the full trial protocol can be accessed, if available                                                                                       | 14    |
| Funding                                              | 25  | Sources of funding and other support (such as supply of drugs), role of funders                                                                   | 13    |

Citation: Schulz KF, Altman DG, Moher D, for the CONSORT Group. CONSORT 2010 Statement: updated guidelines for reporting parallel group randomised trials. *BMC Medicine*. 2010;8:18. © 2010 Schulz et al. This is an Open Access article distributed under the terms of the Creative Commons Attribution License (<http://creativecommons.org/licenses/by/2.0>), which permits unrestricted use, distribution, and reproduction in any medium, provided the original work is properly cited.

\*We strongly recommend reading this statement in conjunction with the CONSORT 2010 Explanation and Elaboration for important clarifications on all the items. If relevant, we also recommend reading CONSORT extensions for cluster randomised trials, non-inferiority and equivalence trials, non-pharmacological treatments, herbal interventions, and pragmatic trials. Additional extensions are forthcoming: for those and for up-to-date references relevant to this checklist, see [www.consort-statement.org](http://www.consort-statement.org).
